# Supplementary material for: Chemical and biosynthetic potential of Penicillium shentong XL-F41
Source: publisher site journal article supplement (doi:10.3762/bjoc.20.52), 2024-03-15
Supplement: Additional file 1 [file 1860-5397-20-52-S1.pdf]

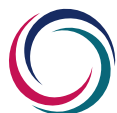

## Supporting Information

for

### Chemical and biosynthetic potential of *Penicillium shentong* XL-F41

Ran Zou, Xin Li, Xiaochen Chen, Yue-Wei Guo and Baofu Xu

*Beilstein J. Org. Chem.* **2024**, *20*, 597–606. [doi:10.3762/bjoc.20.52](https://doi.org/10.3762/bjoc.20.52)

### NMR and mass spectra of isolated compounds

## Table of contents

|                                                                                                 |     |
|-------------------------------------------------------------------------------------------------|-----|
| Figure S1. $^1\text{H}$ NMR spectrum (600 MHz, chloroform-d) of <b>1</b> .....                  | S3  |
| Figure S2. $^{13}\text{C}$ NMR spectrum (600 MHz, chloroform-d) of <b>1</b> .....               | S3  |
| Figure S3. HSQC spectrum (600 MHz, chloroform-d) of <b>1</b> .....                              | S4  |
| Figure S4. $^1\text{H}$ - $^1\text{H}$ COSY spectrum (600 MHz, chloroform-d) of <b>1</b> .....  | S4  |
| Figure S5. HMBC spectrum (600 MHz, chloroform-d) of <b>1</b> .....                              | S5  |
| Figure S6. NOESY spectrum (600 MHz, chloroform-d) of <b>1</b> .....                             | S5  |
| Figure S7. HRESIMS spectrum of <b>1</b> .....                                                   | S6  |
| Figure S8. FT-IR spectrum of compound <b>1</b> .....                                            | S6  |
| Figure S9. Chemical structure of compound <b>1</b> .....                                        | S7  |
| Figure S10. $^1\text{H}$ NMR spectrum (600 MHz, chloroform-d) of <b>2</b> .....                 | S8  |
| Figure S11. $^{13}\text{C}$ NMR spectrum (600 MHz, chloroform-d) of <b>2</b> .....              | S8  |
| Figure S12. HSQC spectrum (600 MHz, chloroform-d) of <b>2</b> .....                             | S9  |
| Figure S13. $^1\text{H}$ - $^1\text{H}$ COSY spectrum (600 MHz, chloroform-d) of <b>2</b> ..... | S9  |
| Figure S14. HMBC spectrum (600 MHz, chloroform-d) of <b>2</b> .....                             | S10 |
| Figure S15. NOESY spectrum (600 MHz, chloroform-d) of <b>2</b> .....                            | S10 |
| Figure S16. HRESIMS spectrum of <b>2</b> .....                                                  | S11 |
| Figure S17. FT-IR spectrum of compound <b>2</b> .....                                           | S11 |
| Figure S18. Chemical structure of compound <b>2</b> .....                                       | S12 |
| Figure S19. $^1\text{H}$ NMR spectrum (600 MHz, chloroform-d) of <b>3</b> .....                 | S13 |
| Figure S20. $^{13}\text{C}$ NMR spectrum (600 MHz, chloroform-d) of <b>3</b> .....              | S13 |
| Figure S21. HSQC spectrum (600 MHz, chloroform-d) of <b>3</b> .....                             | S14 |
| Figure S22. $^1\text{H}$ - $^1\text{H}$ COSY spectrum (600 MHz, chloroform-d) of <b>3</b> ..... | S14 |
| Figure S23. HMBC spectrum (600 MHz, chloroform-d) of <b>3</b> .....                             | S15 |

|                                                                                                        |     |
|--------------------------------------------------------------------------------------------------------|-----|
| Figure S24. NOESY spectrum (600 MHz, chloroform-d) of <b>3</b> .....                                   | S15 |
| Figure S25. LC-MS spectrum of <b>3</b> .....                                                           | S16 |
| Figure S26. FT-IR spectrum of compound <b>3</b> .....                                                  | S16 |
| Figure S27. Chemical structure of compounds <b>3</b> .....                                             | S16 |
| Figure S28. <sup>1</sup> H NMR spectrum (600 MHz, chloroform-d) of <b>4</b> .....                      | S17 |
| Figure S29. <sup>1</sup> H NMR spectrum (600 MHz, chloroform-d) of <b>5</b> .....                      | S18 |
| Figure S30. <sup>1</sup> H NMR spectrum (600 MHz, acetone- <i>d</i> <sub>6</sub> ) of <b>6</b> .....   | S19 |
| Figure S31. <sup>1</sup> H NMR spectrum (600 MHz, acetone- <i>d</i> <sub>6</sub> ) of <b>7</b> .....   | S20 |
| Figure S32. <sup>1</sup> H NMR spectrum (600 MHz, chloroform-d) of <b>8</b> .....                      | S21 |
| Figure S33. <sup>1</sup> H NMR spectrum (600 MHz, chloroform-d) of <b>9</b> .....                      | S22 |
| Figure S34. <sup>1</sup> H NMR spectrum (600 MHz, chloroform-d) of <b>10</b> .....                     | S23 |
| Figure S35. <sup>1</sup> H NMR spectrum (600 MHz, acetone- <i>d</i> <sub>6</sub> ) of <b>11</b> .....  | S24 |
| Figure S36. <sup>1</sup> H NMR spectrum (600 MHz, methanol- <i>d</i> <sub>4</sub> ) of <b>12</b> ..... | S25 |
| Figure S37. The biosynthetic pathways of the quinoline ring formation .....                            | S26 |
| References .....                                                                                       | S27 |

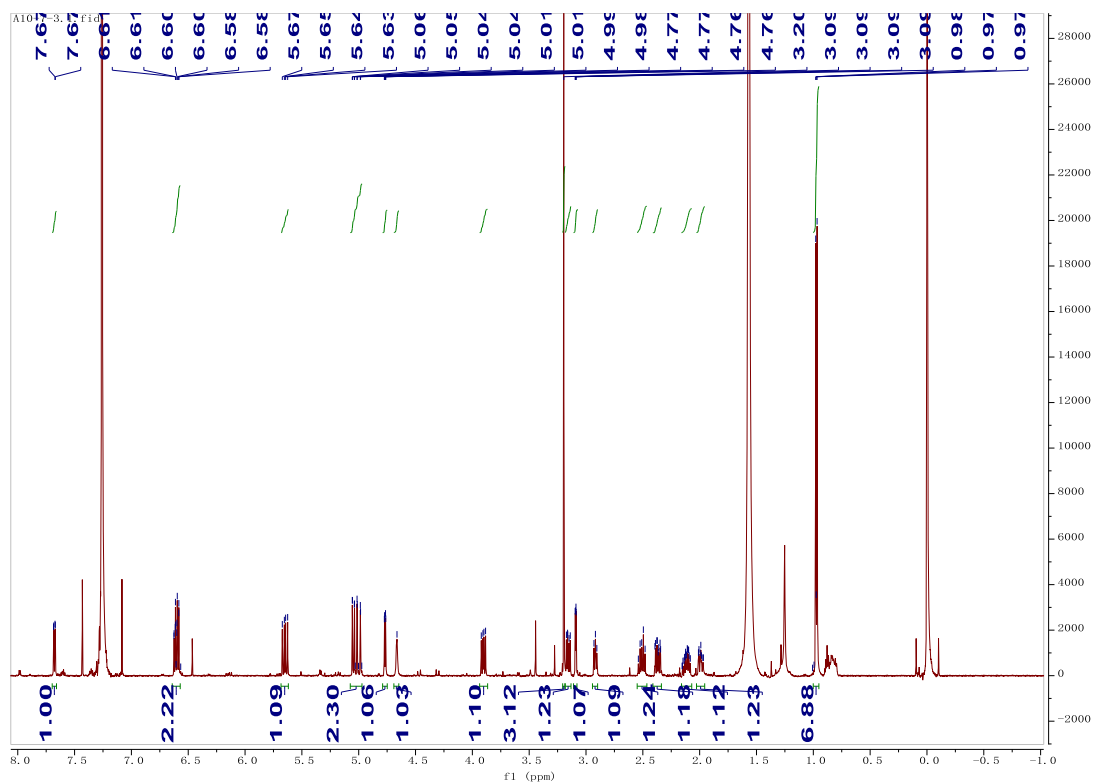

Figure S1. <sup>1</sup>H NMR spectrum (600 MHz, chloroform-d) of **1**

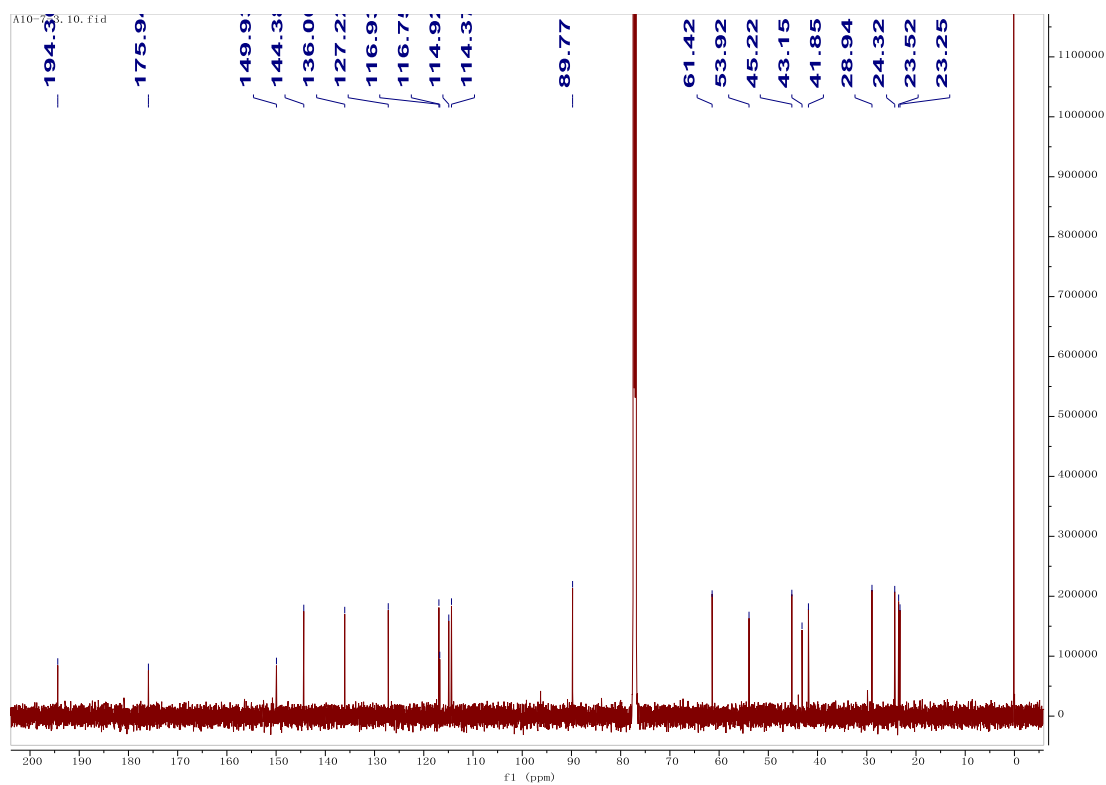

Figure S2. <sup>13</sup>C NMR spectrum (600 MHz, chloroform-d) of **1**

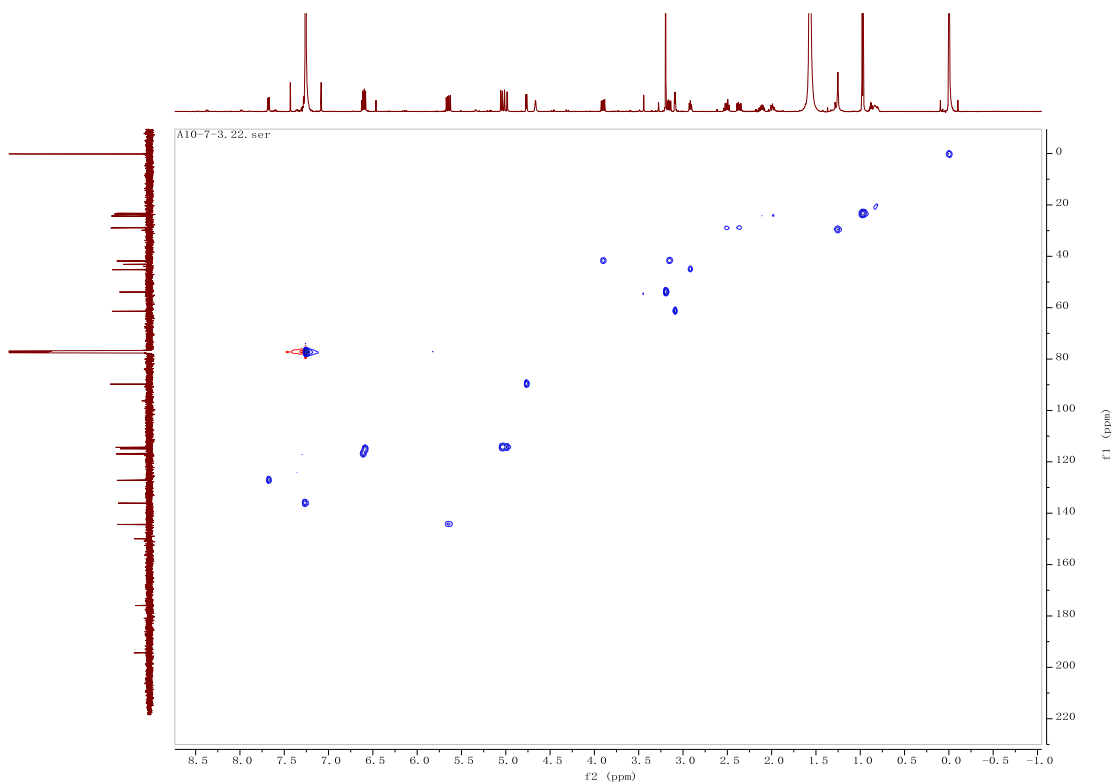

Figure S3. HSQC spectrum (600 MHz, chloroform-d) of **1**

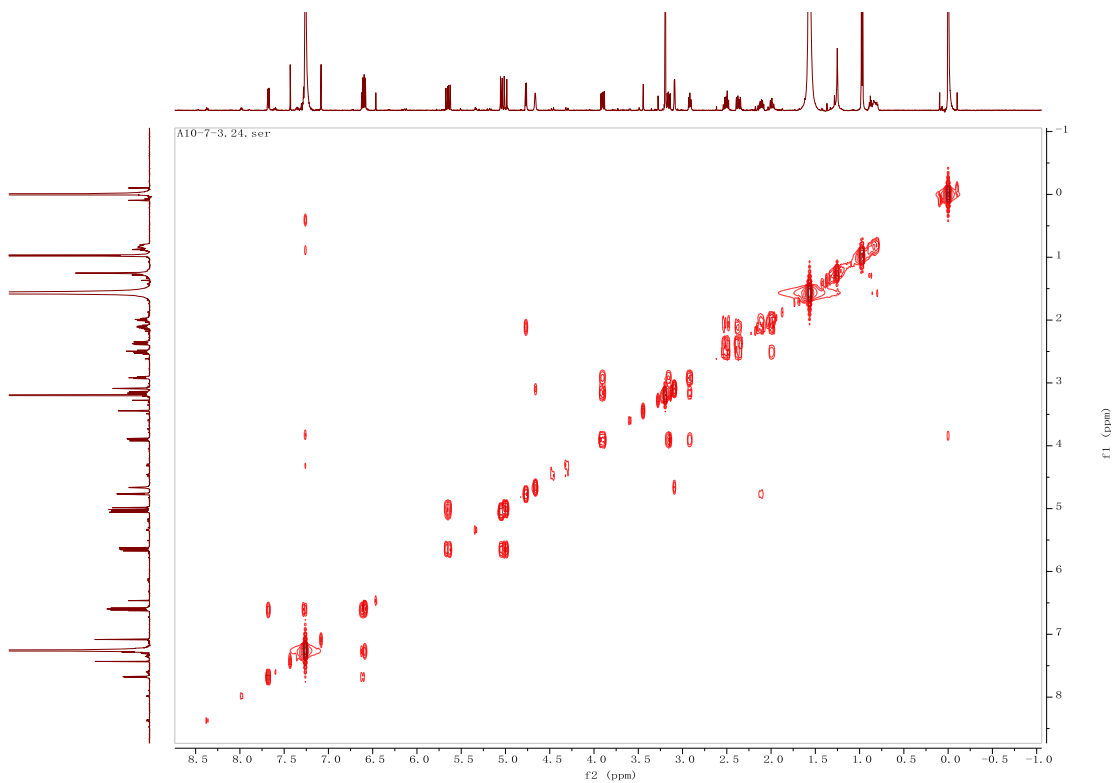

Figure S4.  $^1\text{H}$ - $^1\text{H}$  COSY spectrum (600 MHz, chloroform-d) of **1**

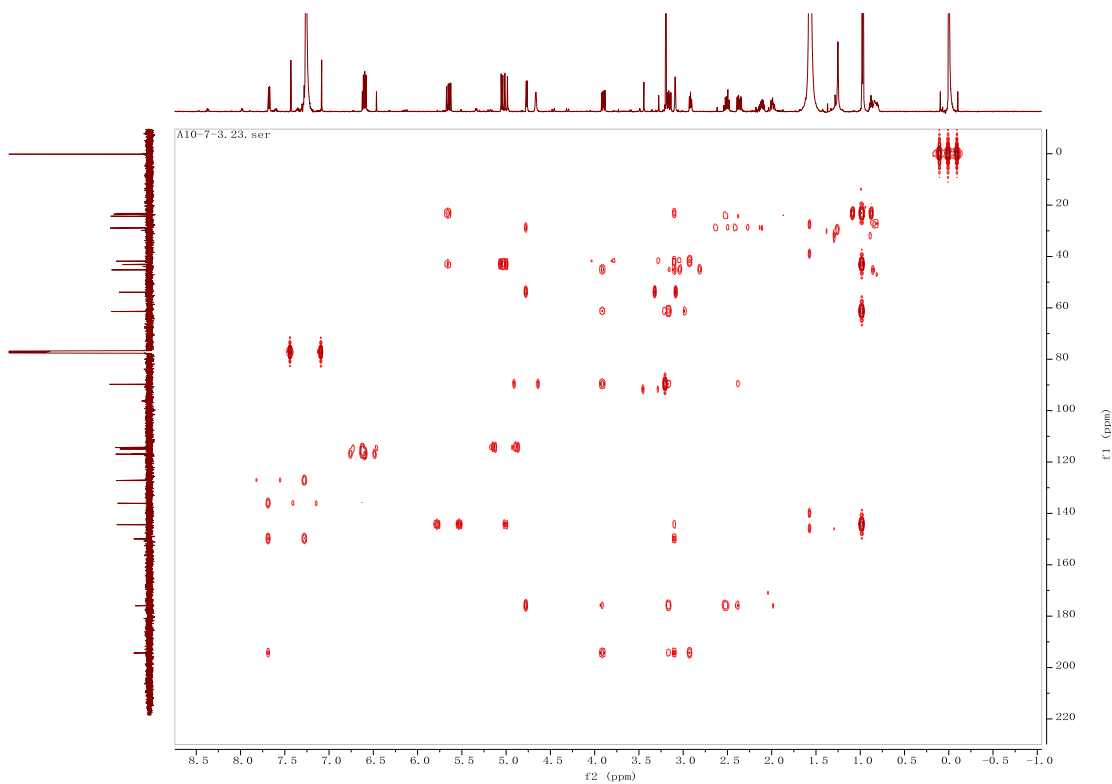

Figure S5. HMBC spectrum (600 MHz, chloroform-d) of **1**

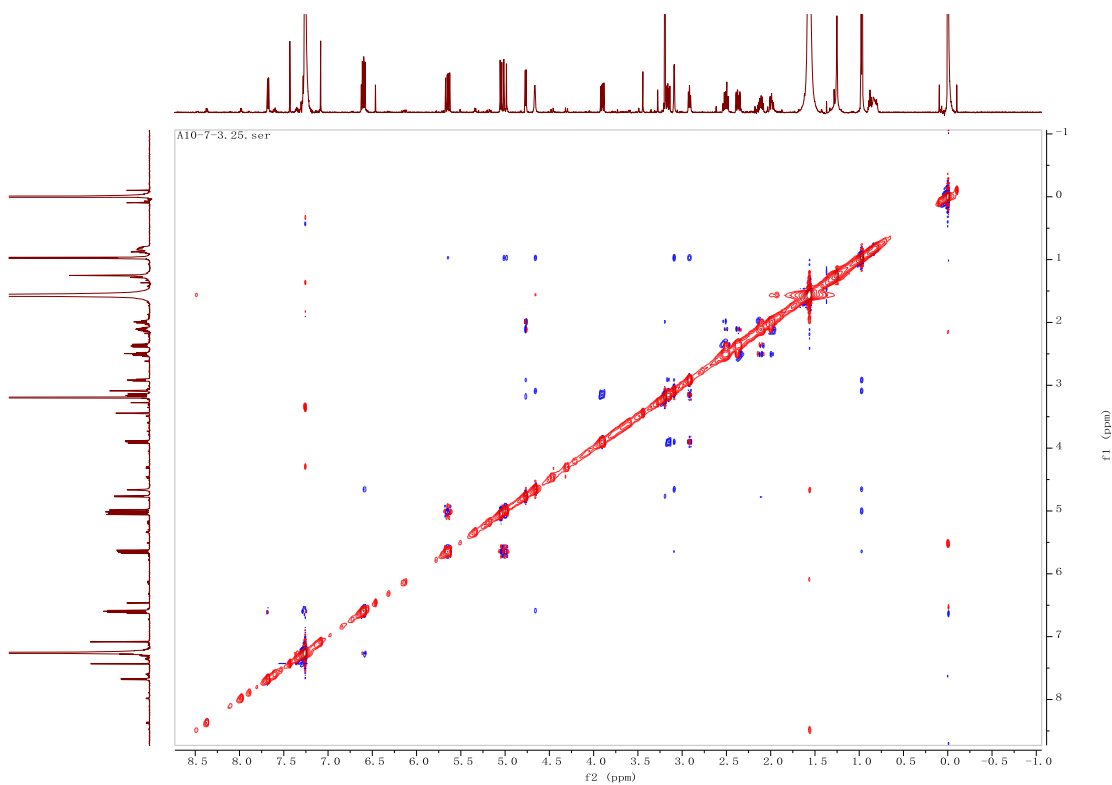

Figure S6. NOESY spectrum (600 MHz, chloroform-d) of **1**

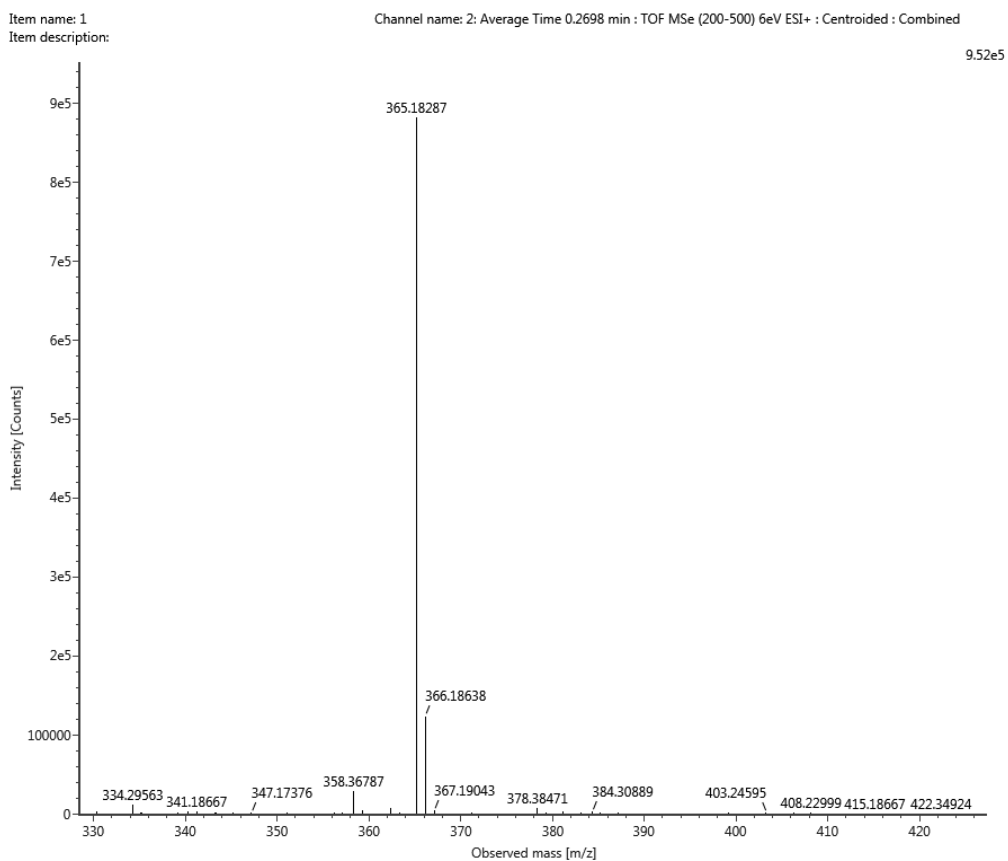

Figure S7. HRESIMS spectrum of **1**

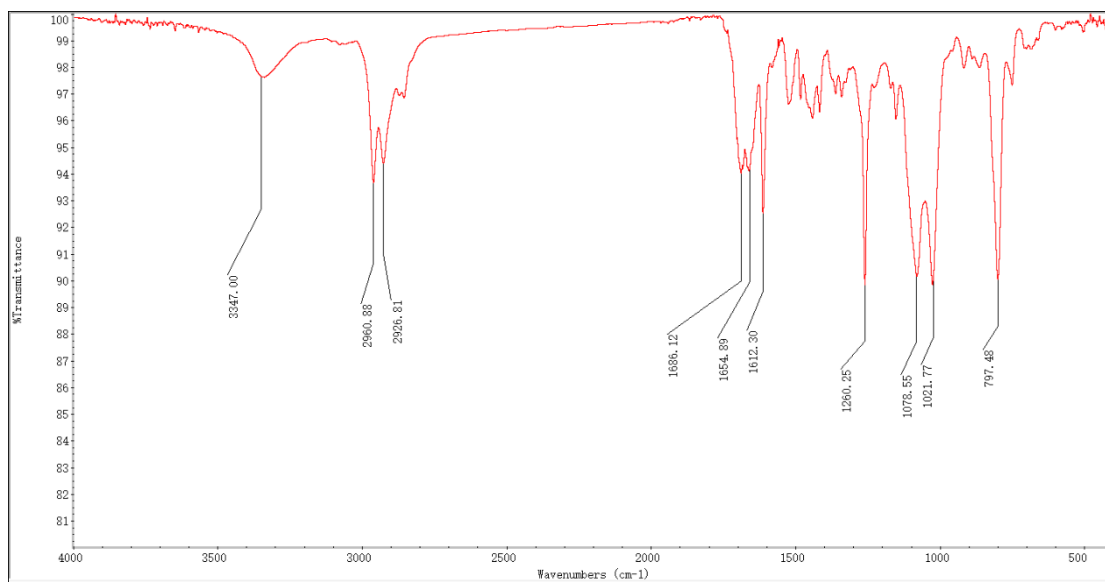

Figure S8. FT-IR spectrum of compound **1**

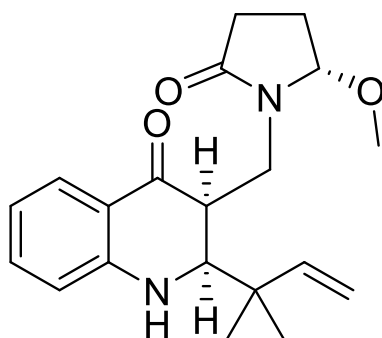

Figure S9. Chemical structure of compound 1



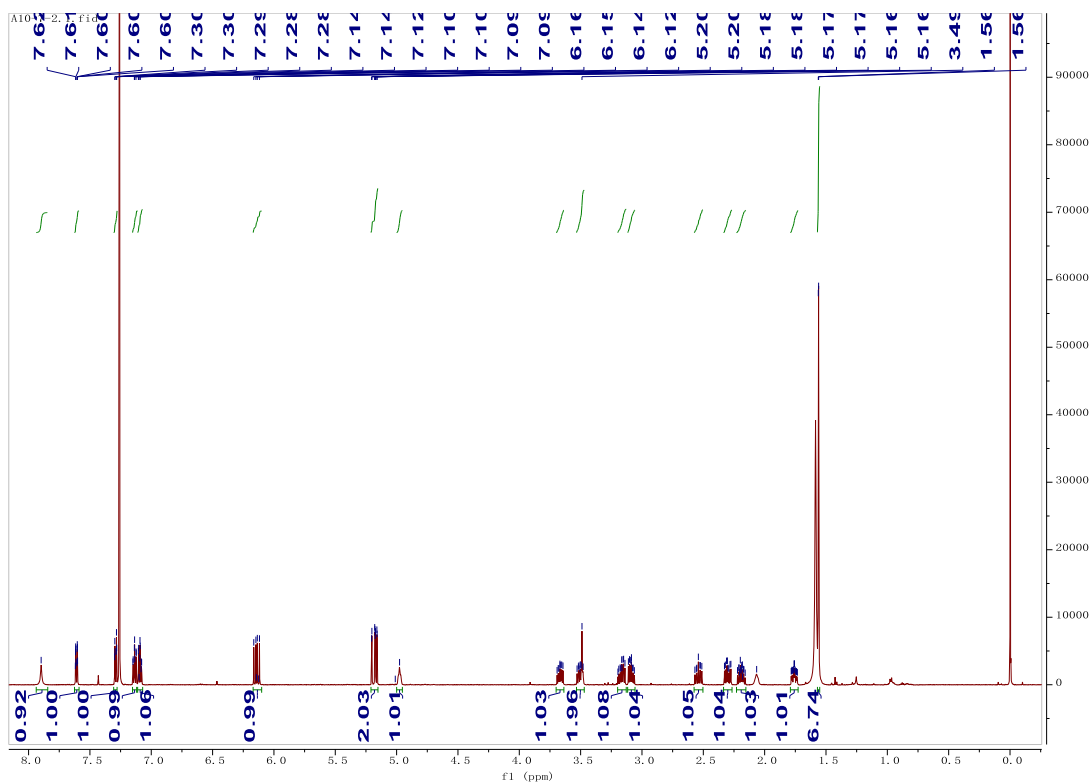

Figure S10.  $^1\text{H}$  NMR spectrum (600 MHz, chloroform-d) of **2**

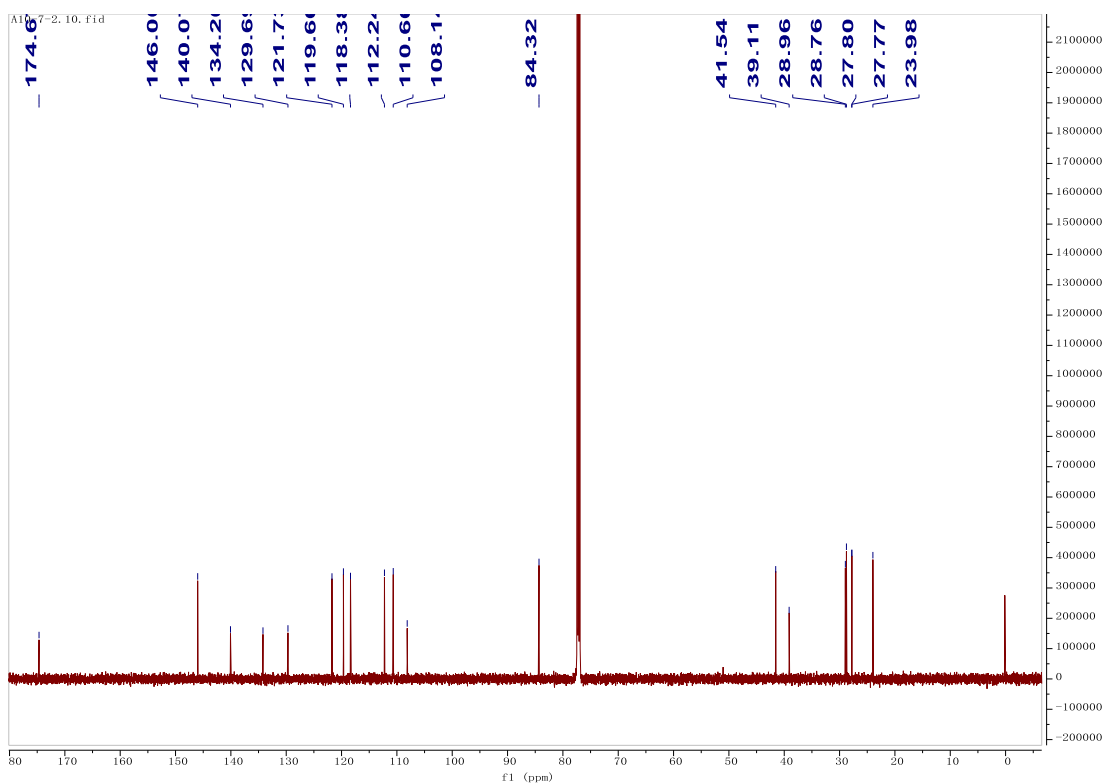

Figure S11.  $^{13}\text{C}$  NMR spectrum (600 MHz, chloroform-d) of **2**

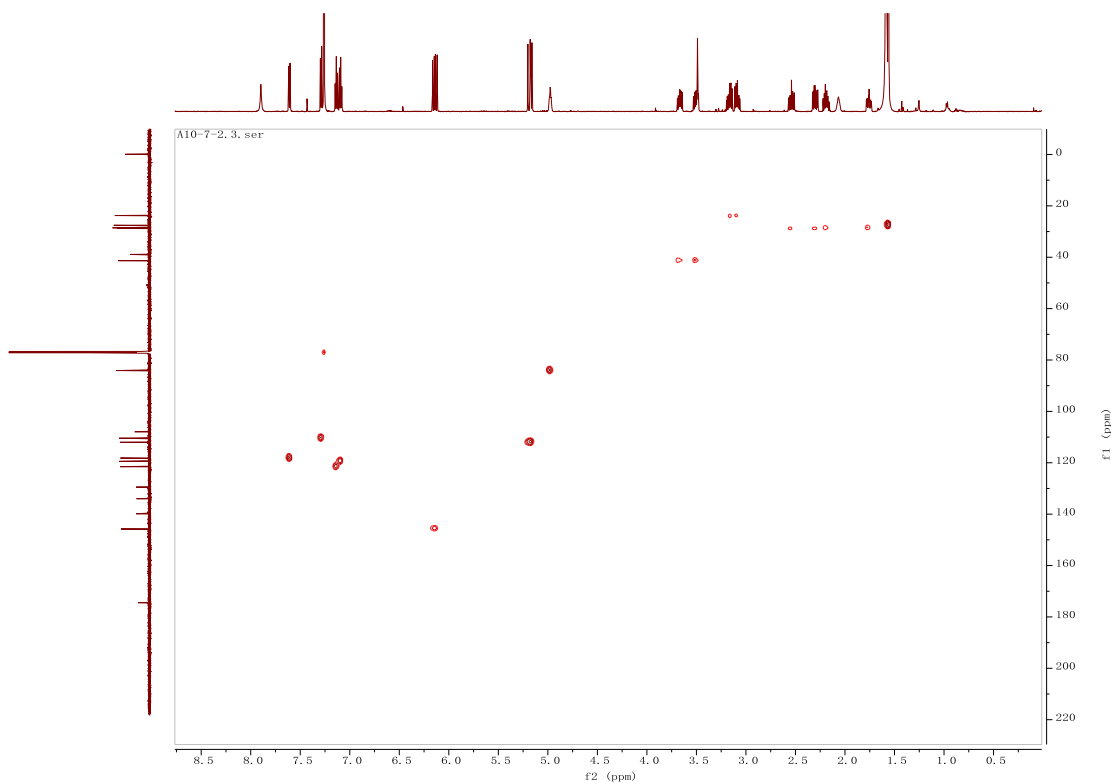

Figure S12. HSQC spectrum (600 MHz, chloroform-d) of **2**

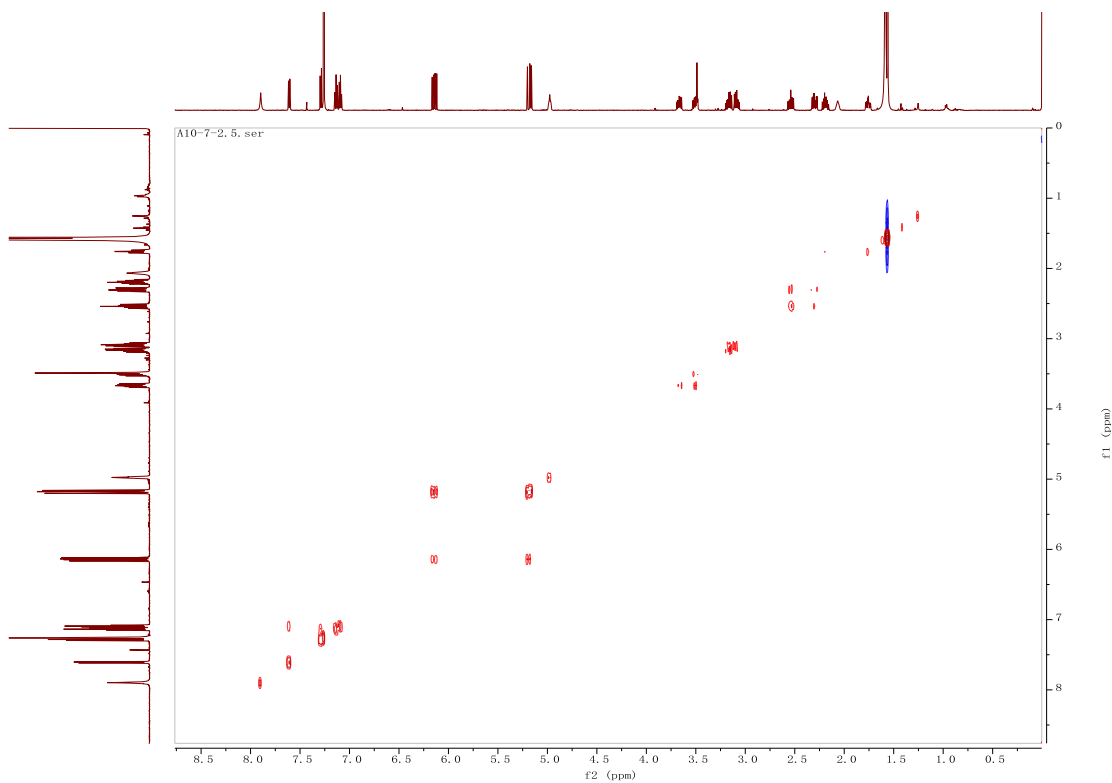

Figure S13.  $^1\text{H}$ - $^1\text{H}$  COSY spectrum (600 MHz, chloroform-d) of **2**

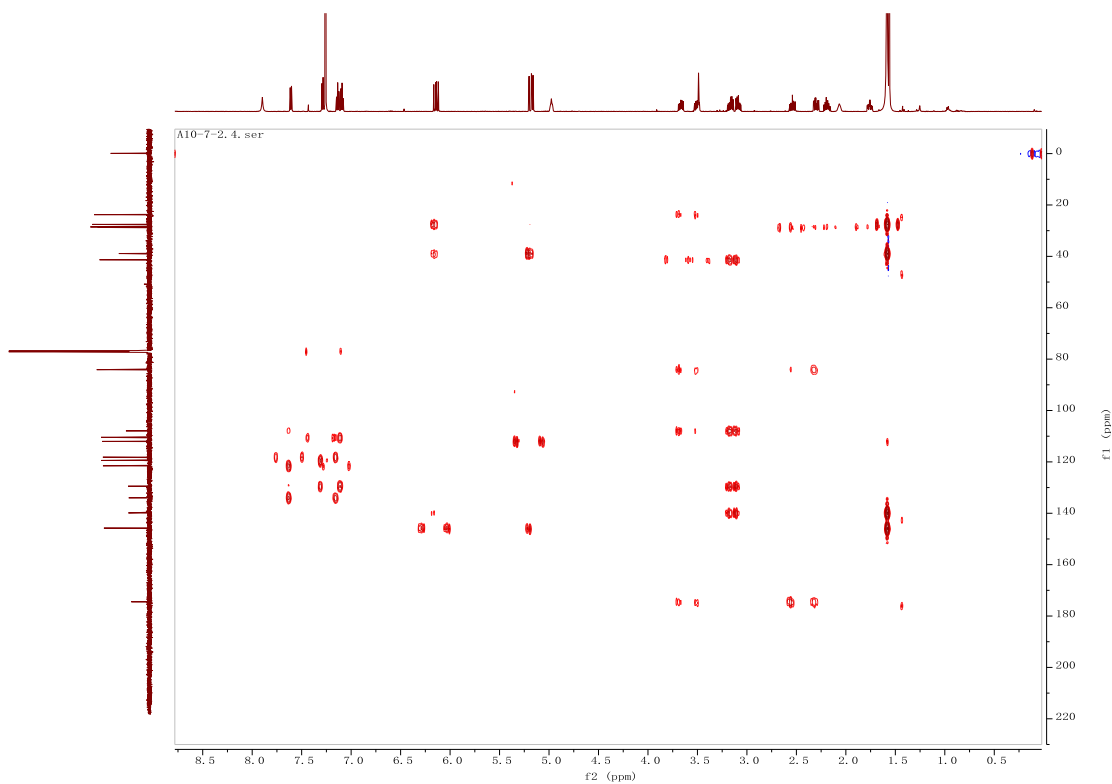

Figure S14. HMBC spectrum (600 MHz, chloroform-d) of **2**

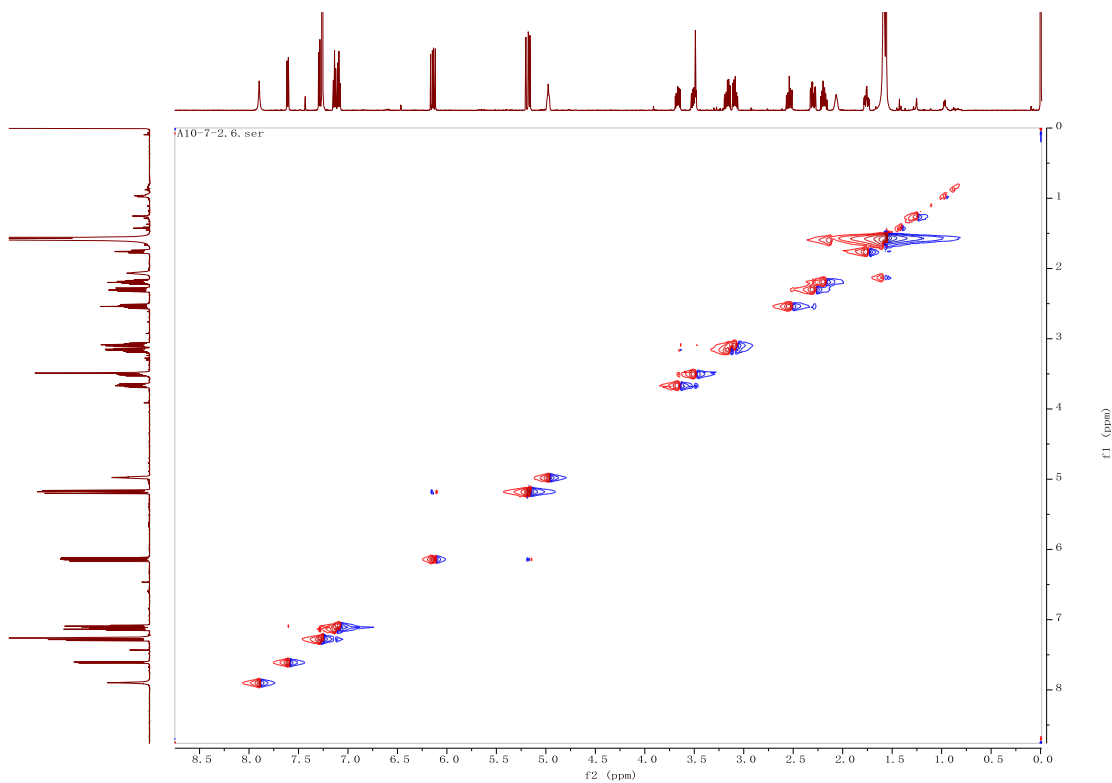

Figure S15. NOESY spectrum (600 MHz, chloroform-d) of **2**

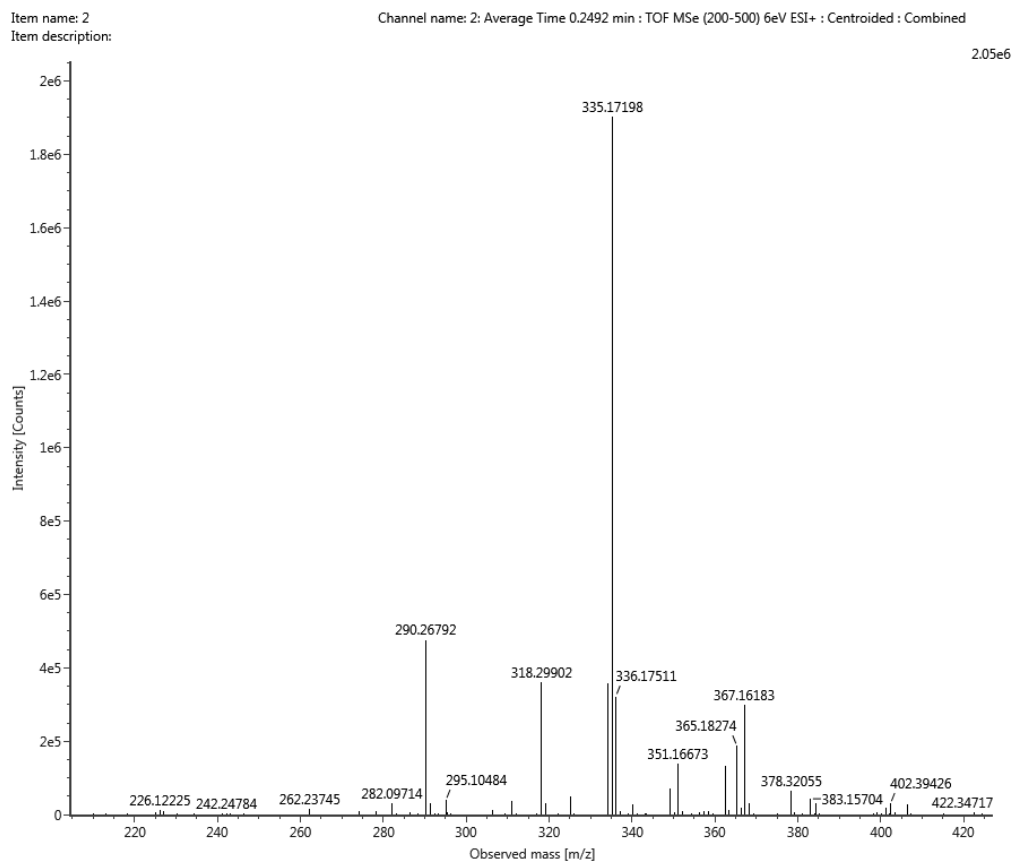

Figure S16. HRESIMS spectrum of **2**

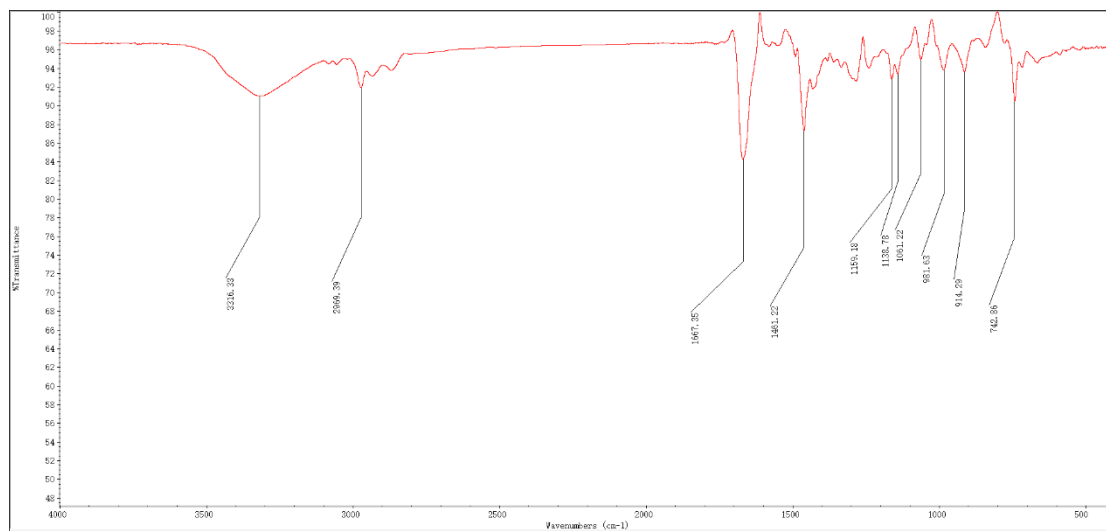

Figure S17. FT-IR spectrum of compound **2**

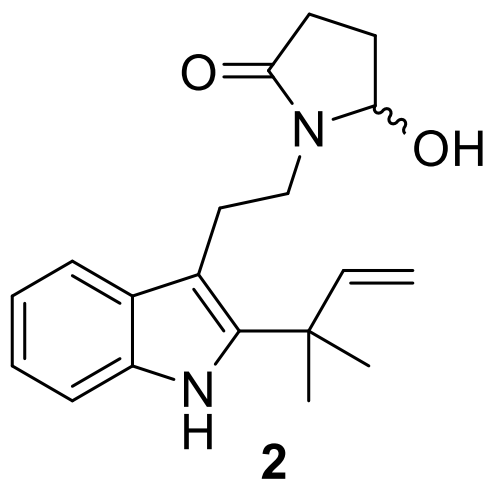

Figure S18. Chemical structure of compound 2



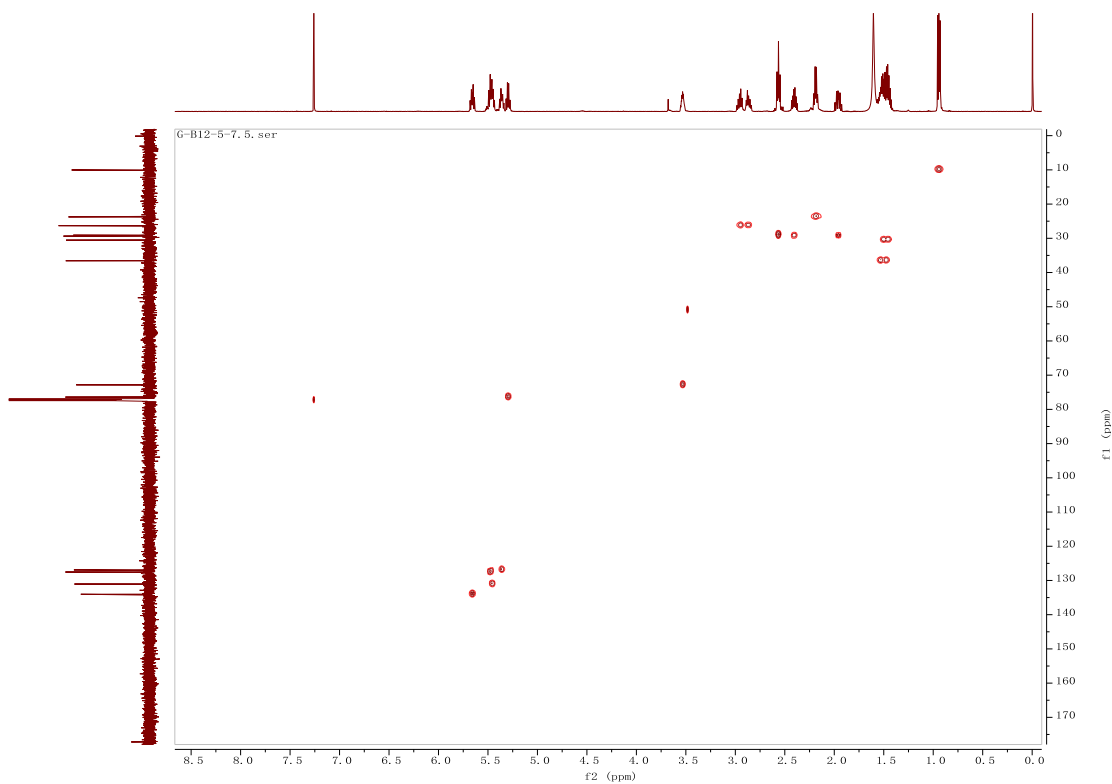

Figure S21. HSQC spectrum (600 MHz, chloroform-d) of **3**

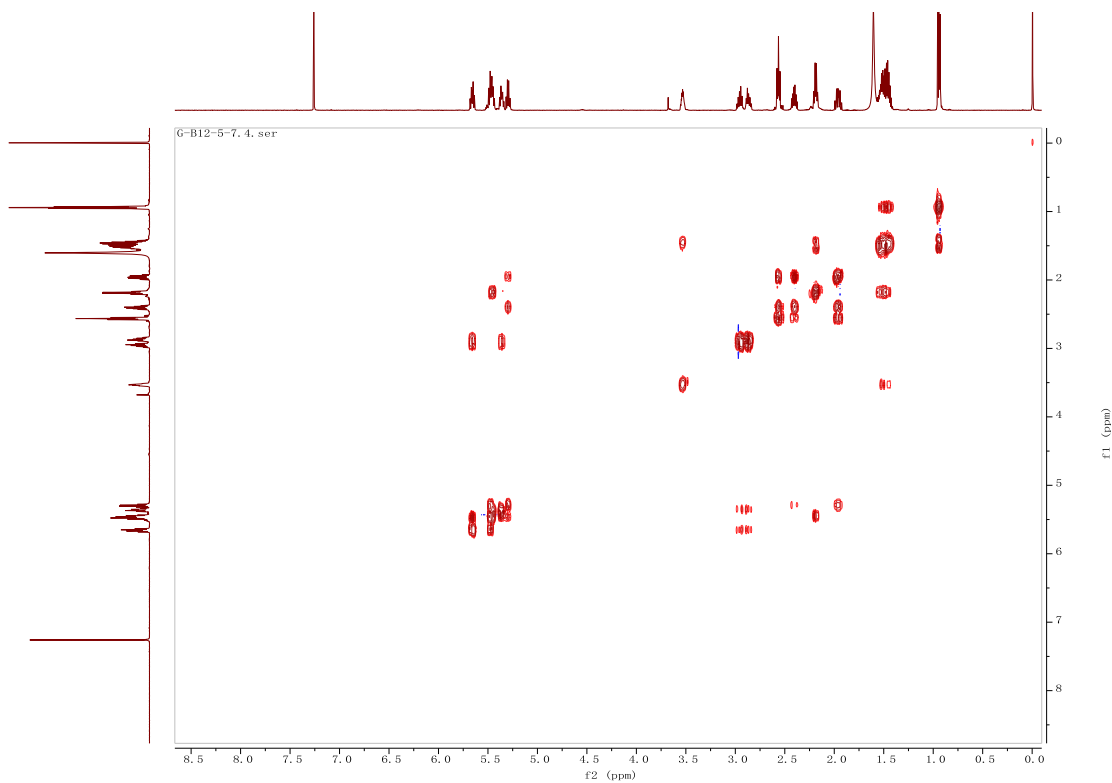

Figure S22.  $^1\text{H}$ - $^1\text{H}$  COSY spectrum (600 MHz, chloroform-d) of **3**

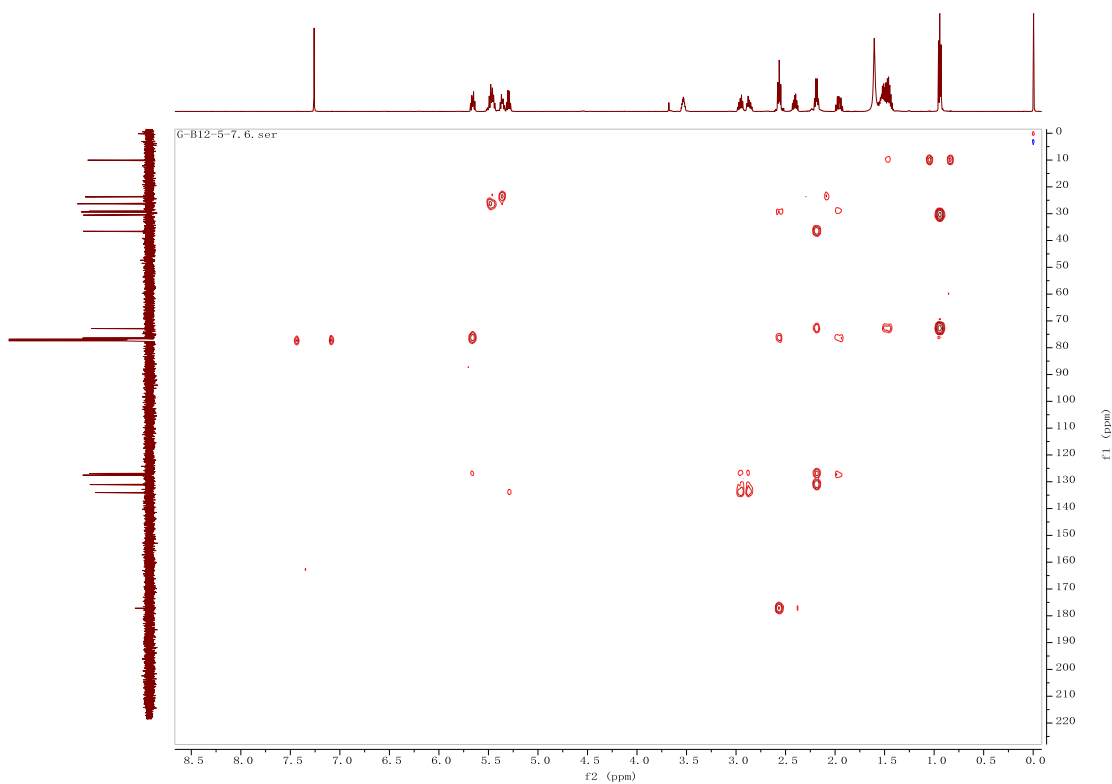

Figure S23. HMBC spectrum (600 MHz, chloroform-d) of **3**

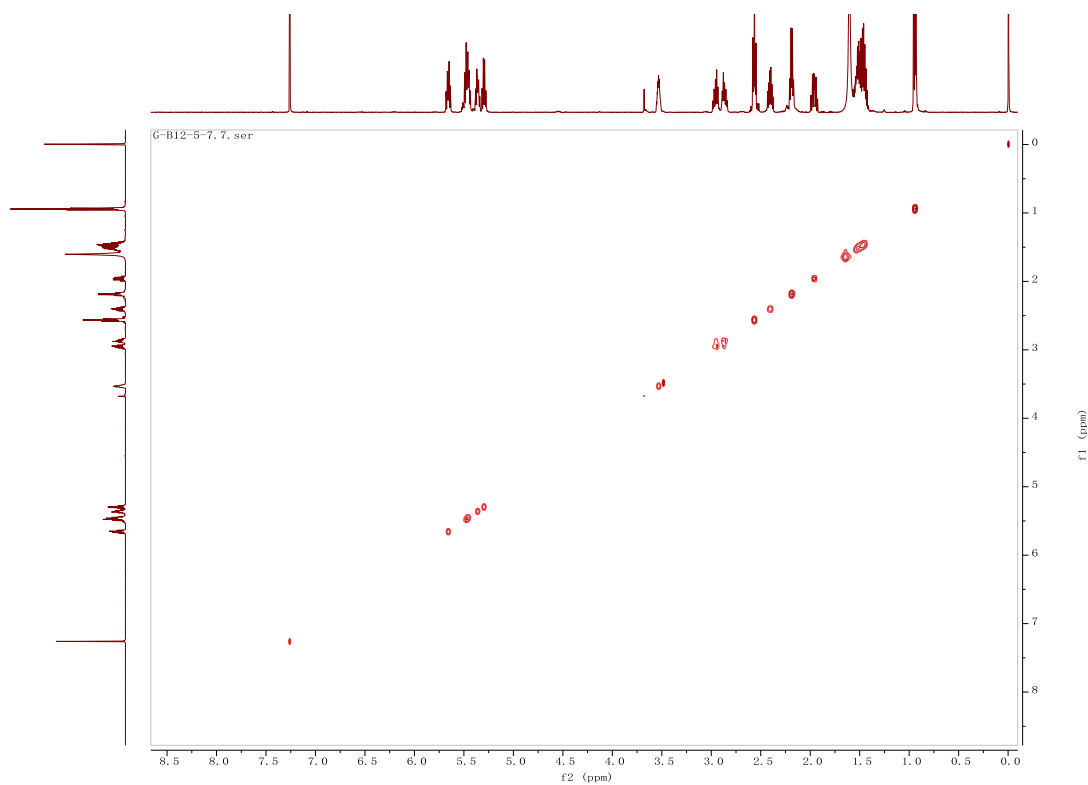

Figure S24. NOESY spectrum (600 MHz, chloroform-d) of **3**



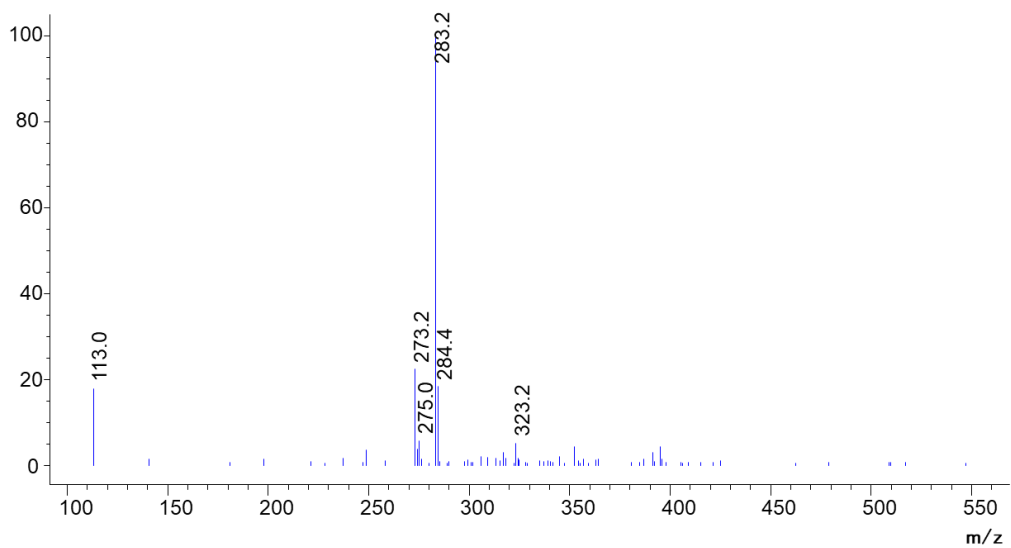

Figure S25. LC-MS spectrum of **3**

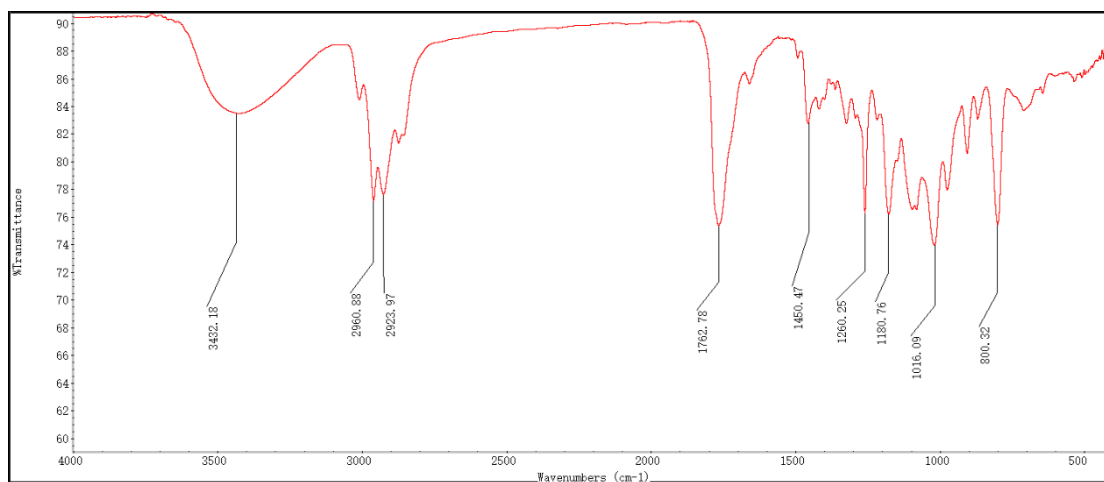

Figure S26. FT-IR spectrum of compound **3**

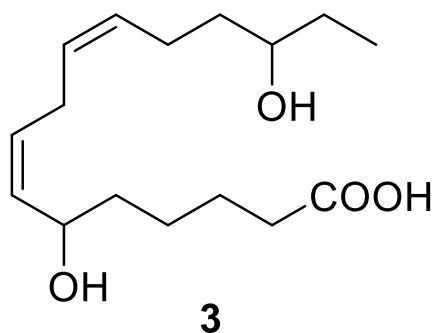

Figure S27. Chemical structure of compounds **3**

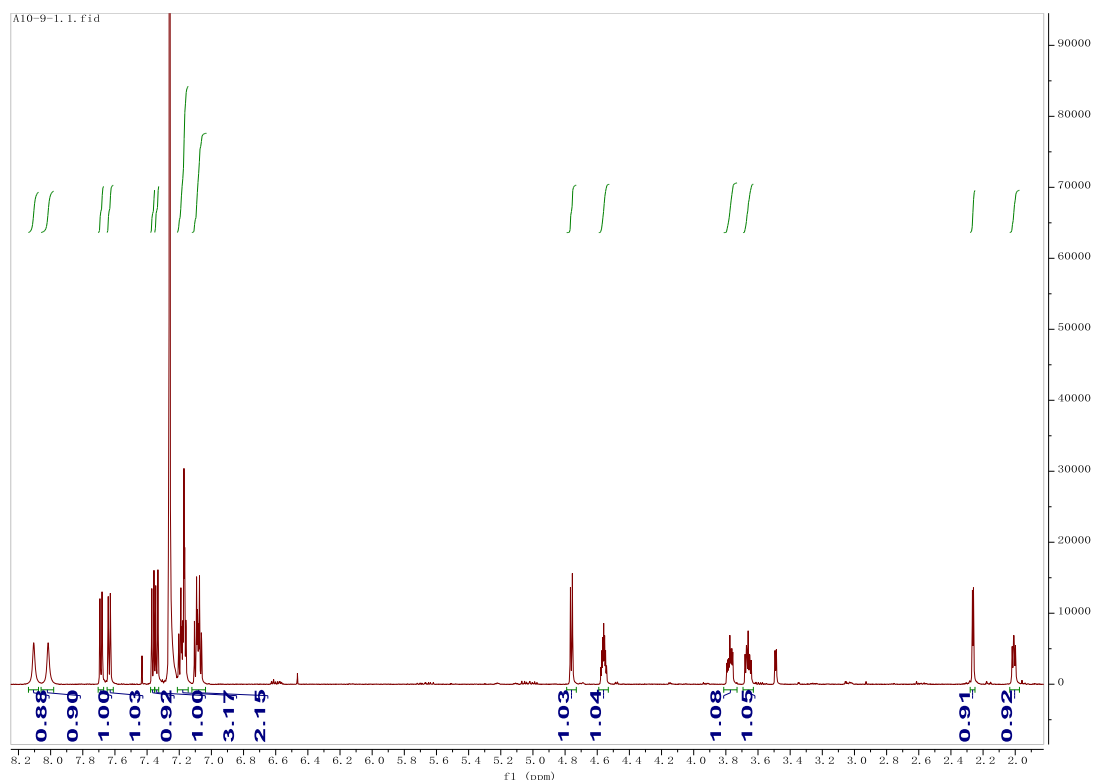

Figure S28. <sup>1</sup>H NMR spectrum (600 MHz, chloroform-d) of **4**

<sup>1</sup>H NMR (600 MHz, chloroform-d)  $\delta$  8.11 (s, 1H), 8.02 (s, 1H), 7.69 (dd,  $J$  = 8.0, 1.0 Hz, 1H), 7.63 (dd,  $J$  = 8.0, 1.0 Hz, 1H), 7.36 (d,  $J$  = 8.2 Hz, 1H), 7.34 (d,  $J$  = 8.1 Hz, 1H), 7.22 – 7.15 (m, 3H), 7.12 – 7.05 (m, 2H), 4.76 (d,  $J$  = 7.2 Hz, 1H), 4.56 (tt,  $J$  = 7.1, 3.6 Hz, 1H), 3.78 (ddd,  $J$  = 10.9, 7.2, 3.5 Hz, 1H), 3.66 (ddd,  $J$  = 11.4, 6.7, 4.9 Hz, 1H), 2.26 (d,  $J$  = 3.9 Hz, 1H), 2.01 (dd,  $J$  = 7.3, 5.1 Hz, 1H). Compound **4** was determined by comparison of its spectroscopic data with fusarindole B in the literature [1].

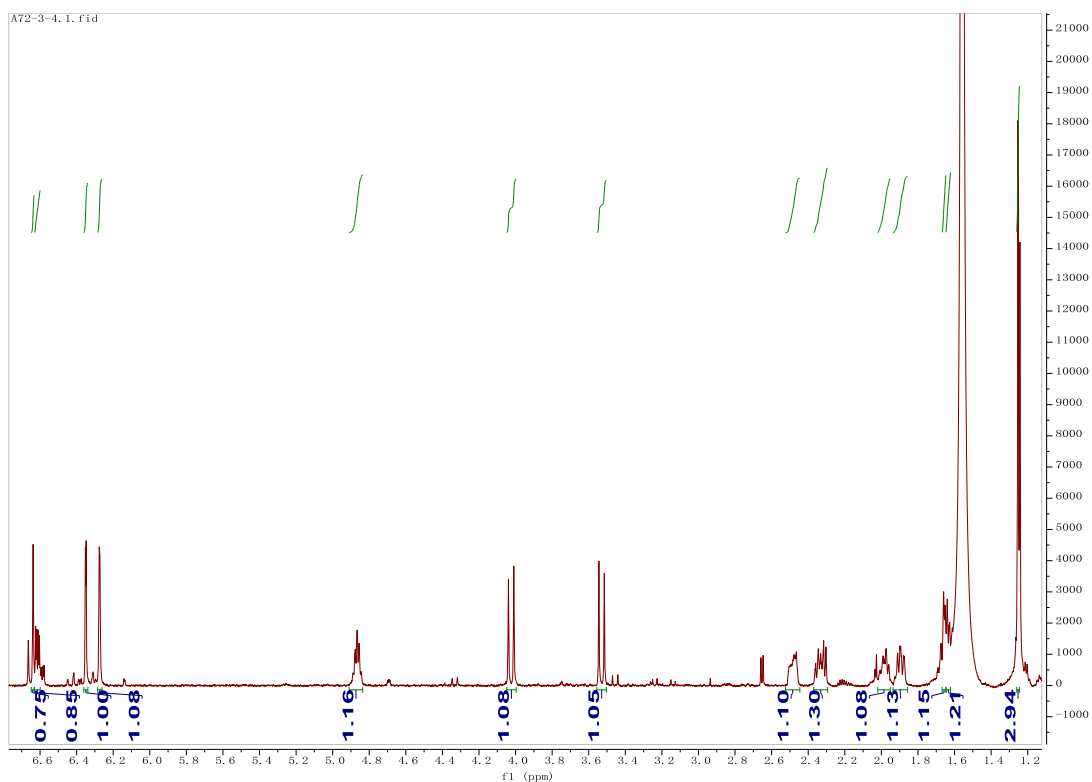

Figure S29.  $^1\text{H}$  NMR spectrum (600 MHz, chloroform-d) of **5**

$^1\text{H}$  NMR (600 MHz, chloroform-d)  $\delta$  6.64 (d,  $J = 1.5$  Hz, 1H), 6.61 (dd,  $J = 8.6, 3.8$  Hz, 1H), 6.35 (d,  $J = 2.5$  Hz, 1H), 6.27 (d,  $J = 2.6$  Hz, 1H), 4.92 – 4.84 (m, 1H), 4.02 (d,  $J = 17.7$  Hz, 1H), 3.53 (d,  $J = 17.7$  Hz, 1H), 2.47 (d,  $J = 8.5$  Hz, 1H), 2.38 – 2.29 (m, 1H), 1.98 (q,  $J = 9.3, 7.6$  Hz, 1H), 1.93 – 1.86 (m, 1H), 1.66 (d,  $J = 4.9$  Hz, 1H), 1.65 – 1.63 (m, 1H), 1.25 (s, 3H). Compound **5** was determined by comparison of its spectroscopic data with dehydrocurvularin in the literature [2].

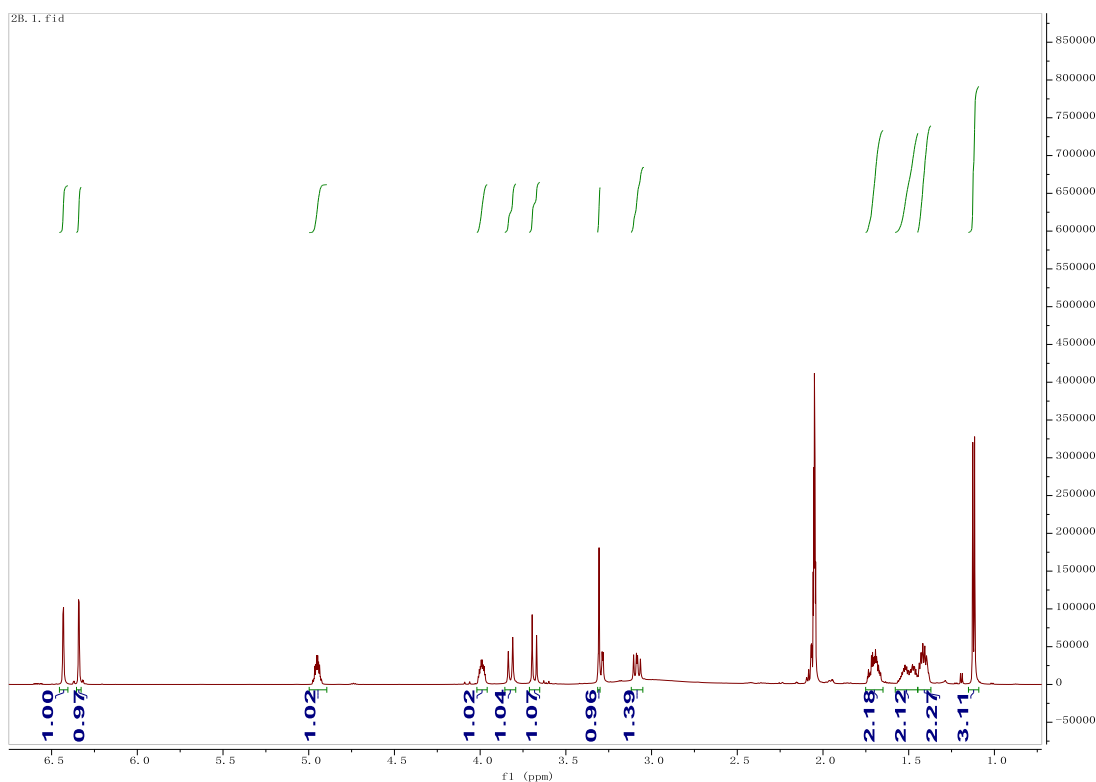

Figure S30.  $^1\text{H}$  NMR spectrum (600 MHz, acetone- $d_6$ ) of **6**

$^1\text{H}$  NMR (600 MHz, acetone- $d_6$ )  $\delta$  6.43 (d,  $J = 2.3$  Hz, 1H), 6.34 (d,  $J = 2.3$  Hz, 1H), 4.95 (td,  $J = 6.6, 3.5$  Hz, 1H), 3.99 (ddt,  $J = 10.4, 7.0, 3.6$  Hz, 1H), 3.82 (d,  $J = 15.4$  Hz, 1H), 3.68 (d,  $J = 15.4$  Hz, 1H), 3.31 (d,  $J = 3.2$  Hz, 1H), 3.08 (dd,  $J = 13.9, 10.0$  Hz, 1H), 1.81 – 1.33 (m, 6H), 1.12 (d,  $J = 6.4$  Hz, 3H). Compound **6** was determined by comparison of its spectroscopic data with hydroxycurvularin in the literature [3].

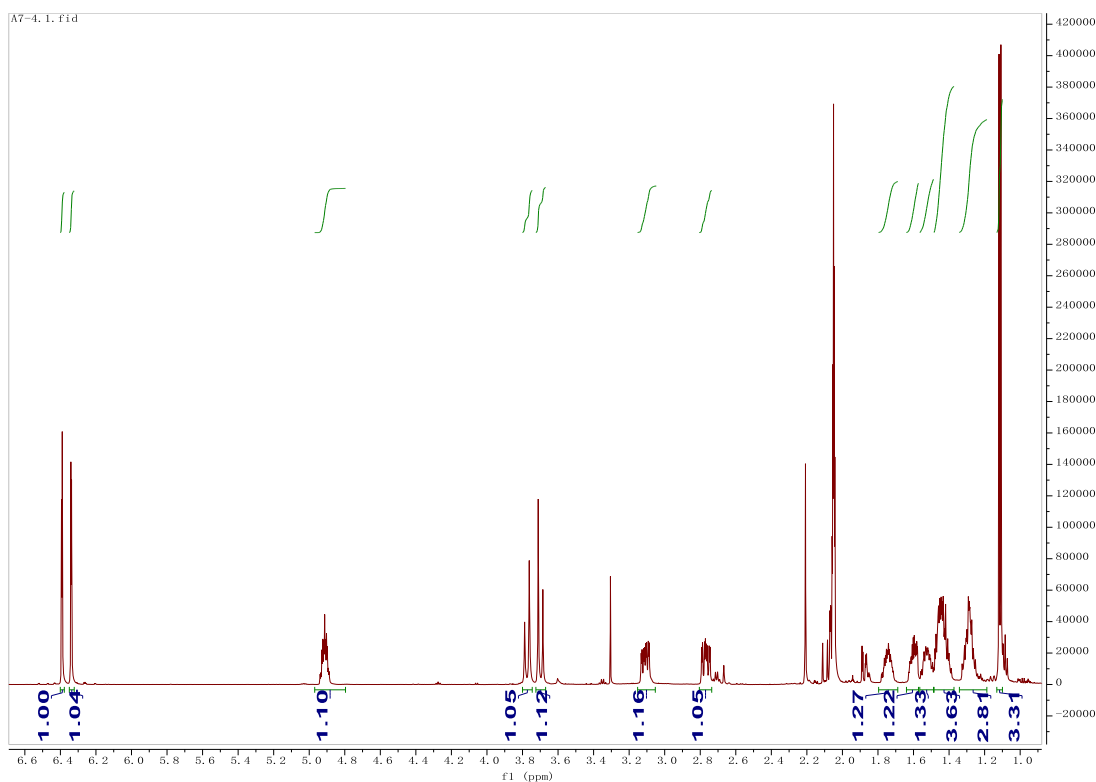

Figure S31.  $^1\text{H}$  NMR spectrum (600 MHz, acetone- $d_6$ ) of **7**

$^1\text{H}$  NMR (600 MHz, acetone- $d_6$ )  $\delta$  6.39 (d,  $J$  = 2.3 Hz, 1H), 6.34 (d,  $J$  = 2.3 Hz, 1H), 4.91 (dq,  $J$  = 9.0, 6.3, 2.8 Hz, 1H), 3.77 (d,  $J$  = 15.7 Hz, 1H), 3.70 (d,  $J$  = 15.6 Hz, 1H), 3.11 (ddd,  $J$  = 15.5, 8.6, 3.0 Hz, 1H), 2.77 (ddd,  $J$  = 15.5, 9.8, 3.0 Hz, 1H), 1.80 – 1.68 (m, 1H), 1.60 (ddt,  $J$  = 14.3, 7.9, 3.2 Hz, 1H), 1.56 – 1.49 (m, 1H), 1.49 – 1.37 (m, 3H), 1.35 – 1.21 (m, 2H), 1.11 (d,  $J$  = 6.3 Hz, 3H). Compound **7** was determined by comparison of its spectroscopic data with curvularin in the literature [4].

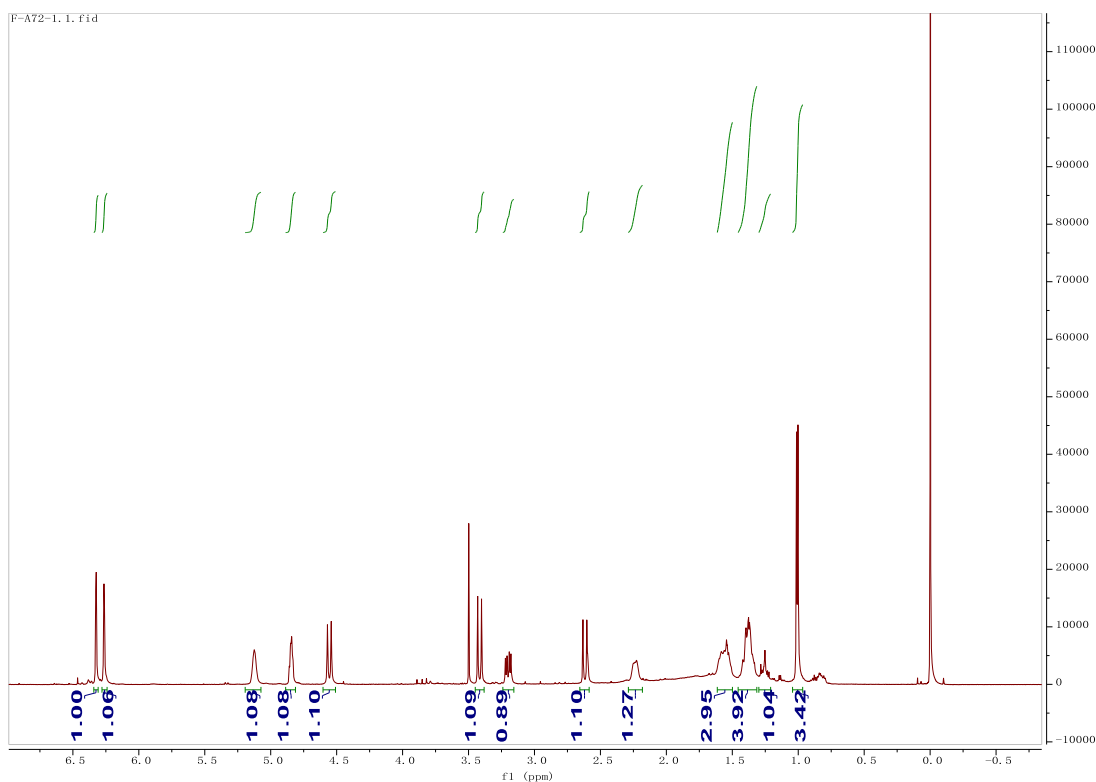

Figure S32. <sup>1</sup>H NMR spectrum (600 MHz, chloroform-d) of **8**

<sup>1</sup>H NMR (600 MHz, chloroform-d)  $\delta$  6.32 (d,  $J = 2.3$  Hz, 1H), 6.28 – 6.24 (m, 1H), 5.12 (s, 1H), 4.85 (q,  $J = 6.1, 5.6$  Hz, 1H), 4.56 (d,  $J = 17.4$  Hz, 1H), 3.42 (d,  $J = 17.4$  Hz, 1H), 3.20 (dd,  $J = 17.7, 7.6$  Hz, 1H), 2.62 (d,  $J = 17.7$  Hz, 1H), 2.23 (s, 1H), 1.66 – 1.49 (m, 2H), 1.44 – 1.31 (m, 3H), 1.30 – 1.22 (m, 1H), 1.01 (d,  $J = 6.6$  Hz, 3H). Compound **8** was determined by comparison of its spectroscopic data with curvulopyran in the literature [5].

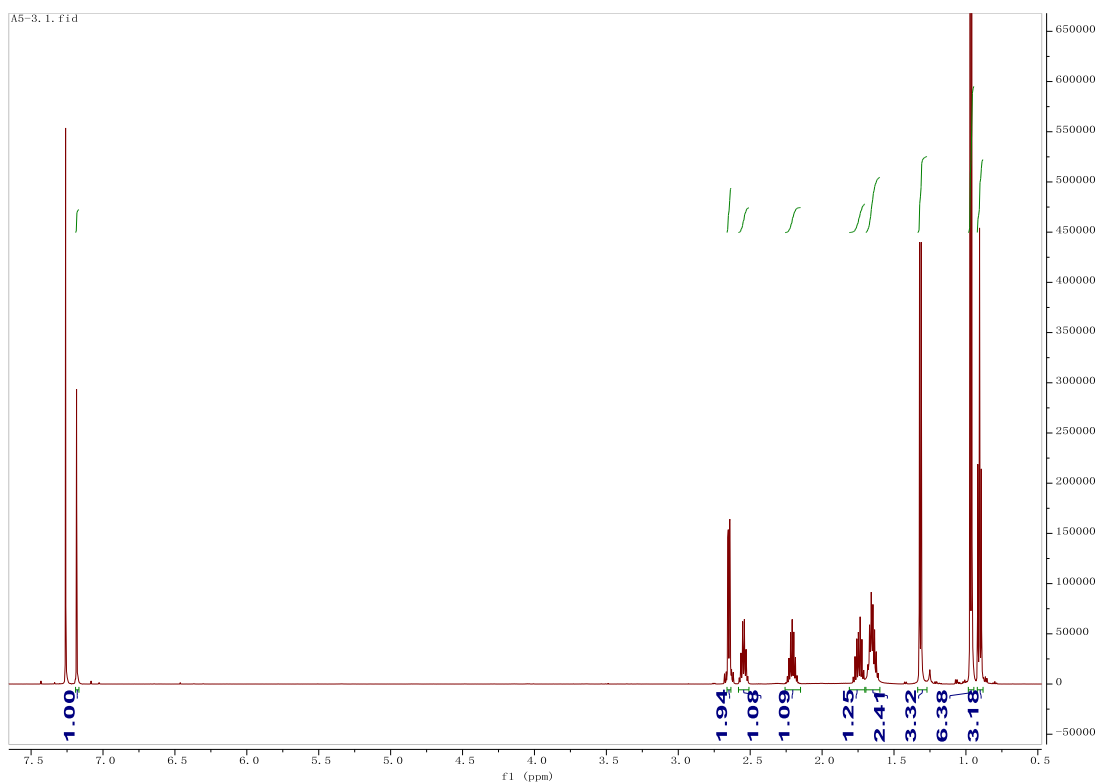

Figure S33.  $^1\text{H}$  NMR spectrum (600 MHz, chloroform-d) of **9**

$^1\text{H}$  NMR (600 MHz, chloroform-d)  $\delta$  7.18 (s, 1H), 2.65 (dd,  $J = 7.1, 1.9$  Hz, 2H), 2.55 (h,  $J = 7.1$  Hz, 1H), 2.21 (dh,  $J = 13.5, 6.7$  Hz, 1H), 1.75 (dt,  $J = 13.7, 7.5$  Hz, 1H), 1.65 (dp,  $J = 14.4, 7.3$  Hz, 2H), 1.32 (d,  $J = 7.0$  Hz, 3H), 0.97 (d,  $J = 6.7$  Hz, 6H), 0.91 (t,  $J = 7.4$  Hz, 3H). Compound **9** was determined by comparison of its spectroscopic data with (S)-6-(sec-butyl)-3-isobutylpyrazin-2(1H)-one in the literature [6].

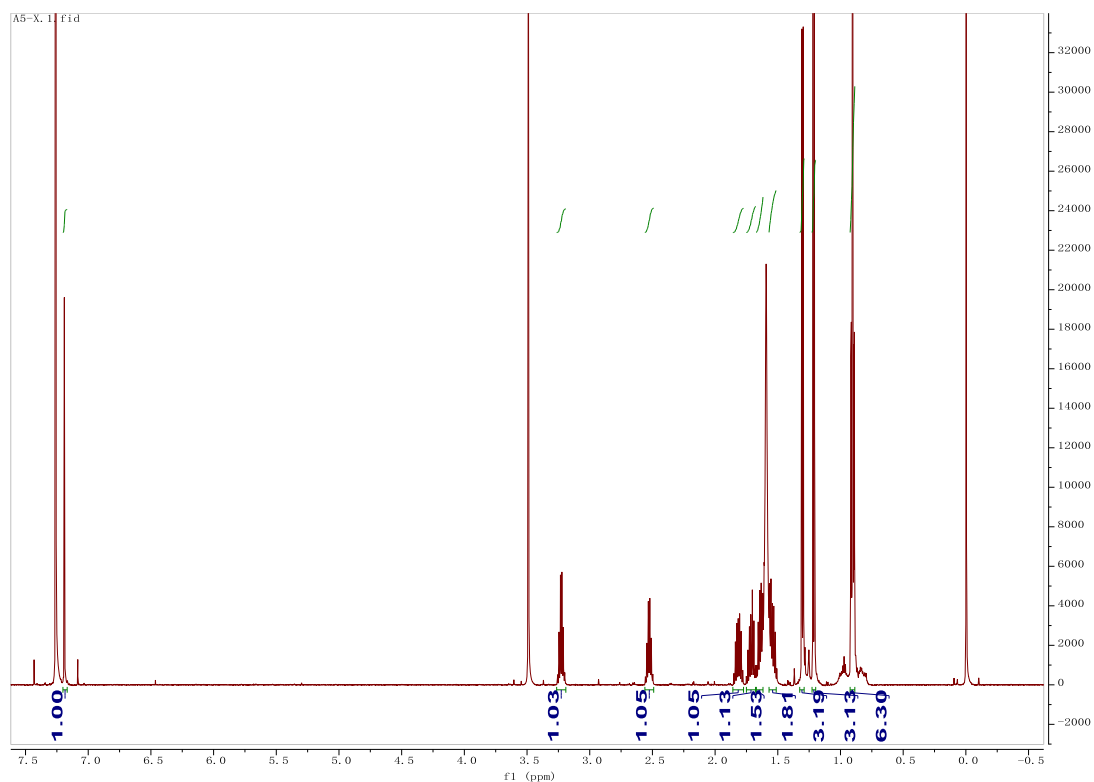

Figure S34.  $^1\text{H}$  NMR spectrum (600 MHz, chloroform-d) of **10**

$^1\text{H}$  NMR (600 MHz, chloroform-d)  $\delta$  7.19 (s, 1H), 3.23 (h,  $J = 6.9$  Hz, 1H), 2.53 (h,  $J = 7.1$  Hz, 1H), 1.87 – 1.77 (m, 1H), 1.71 (dt,  $J = 13.8, 7.5$  Hz, 1H), 1.64 (dt,  $J = 14.1, 7.2$  Hz, 1H), 1.54 (dt,  $J = 13.4, 7.3$  Hz, 1H), 1.30 (d,  $J = 7.0$  Hz, 3H), 1.21 (d,  $J = 6.9$  Hz, 3H), 0.90 (td,  $J = 7.4, 2.9$  Hz, 6H). Compound **10** was determined by comparison of its spectroscopic data with 3,6-di-sec-butyl-2(1H)-pyrazinone in the literature [6].



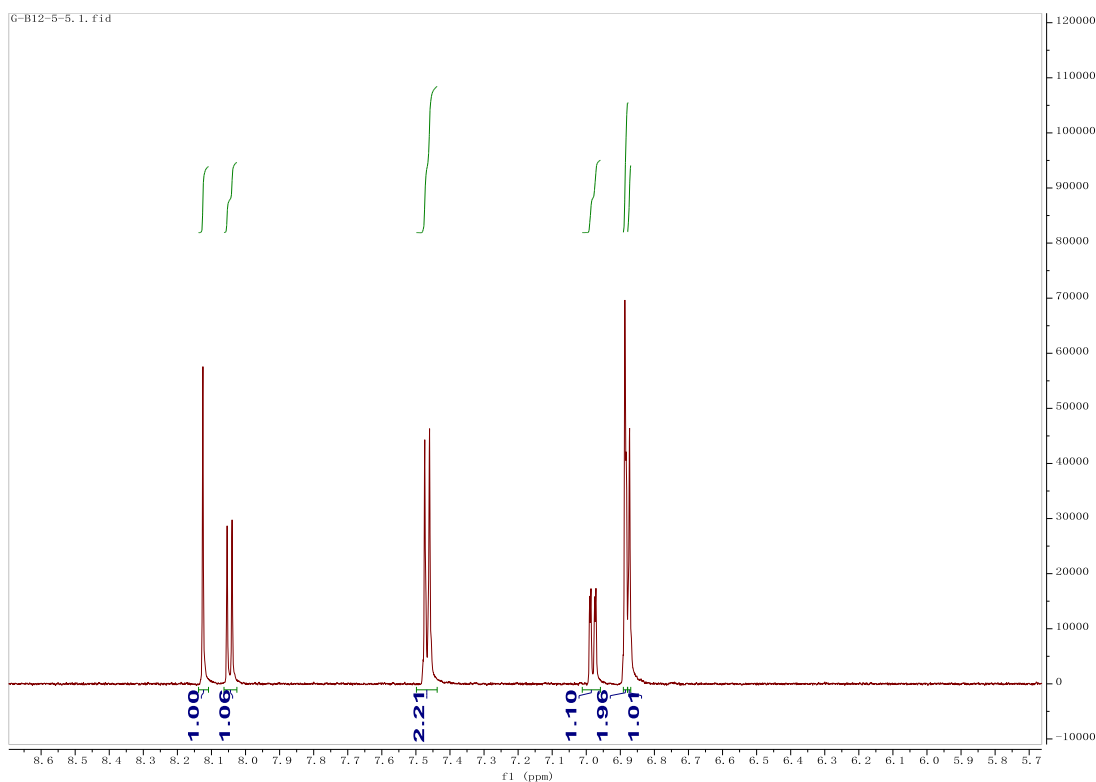

Figure S35.  $^1\text{H}$  NMR spectrum (600 MHz, acetone- $d_6$ ) of **11**

$^1\text{H}$  NMR (600 MHz, acetone- $d_6$ )  $\delta$  8.13 (s, 1H), 8.05 (d,  $J = 8.7$  Hz, 1H), 7.47 (d,  $J = 8.5$  Hz, 2H), 6.98 (dd,  $J = 8.8, 2.3$  Hz, 1H), 6.88 (d,  $J = 2.6$  Hz, 2H), 6.87 (d,  $J = 2.3$  Hz, 1H). Compound **11** was determined by comparison of its spectroscopic data with daidzein in the literature [7].

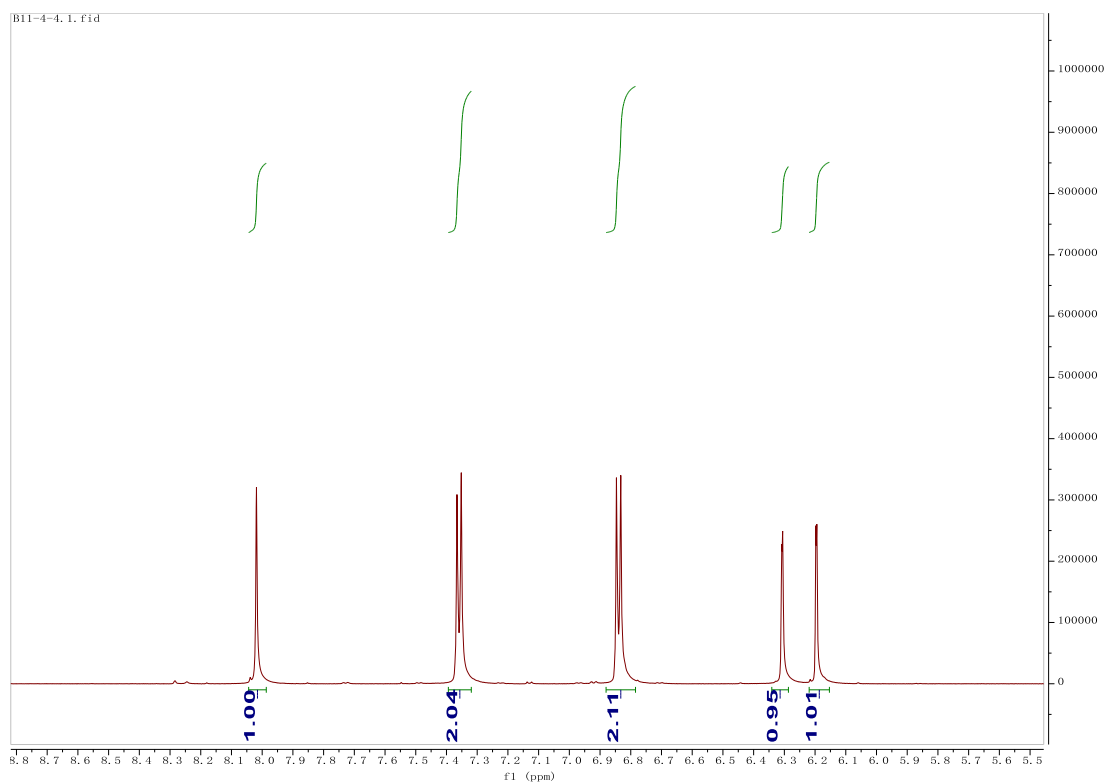

Figure S36.  $^1\text{H}$  NMR spectrum (600 MHz, methanol- $d_4$ ) of **12**

$^1\text{H}$  NMR (600 MHz, methanol- $d_4$ )  $\delta$  8.02 (s, 1H), 7.36 (d,  $J = 8.3$  Hz, 2H), 6.84 (d,  $J = 8.3$  Hz, 2H), 6.31 (d,  $J = 2.1$  Hz, 1H), 6.20 (d,  $J = 2.1$  Hz, 1H). Compound **12** was determined by comparison of its spectroscopic data with genistein in the literature [8].

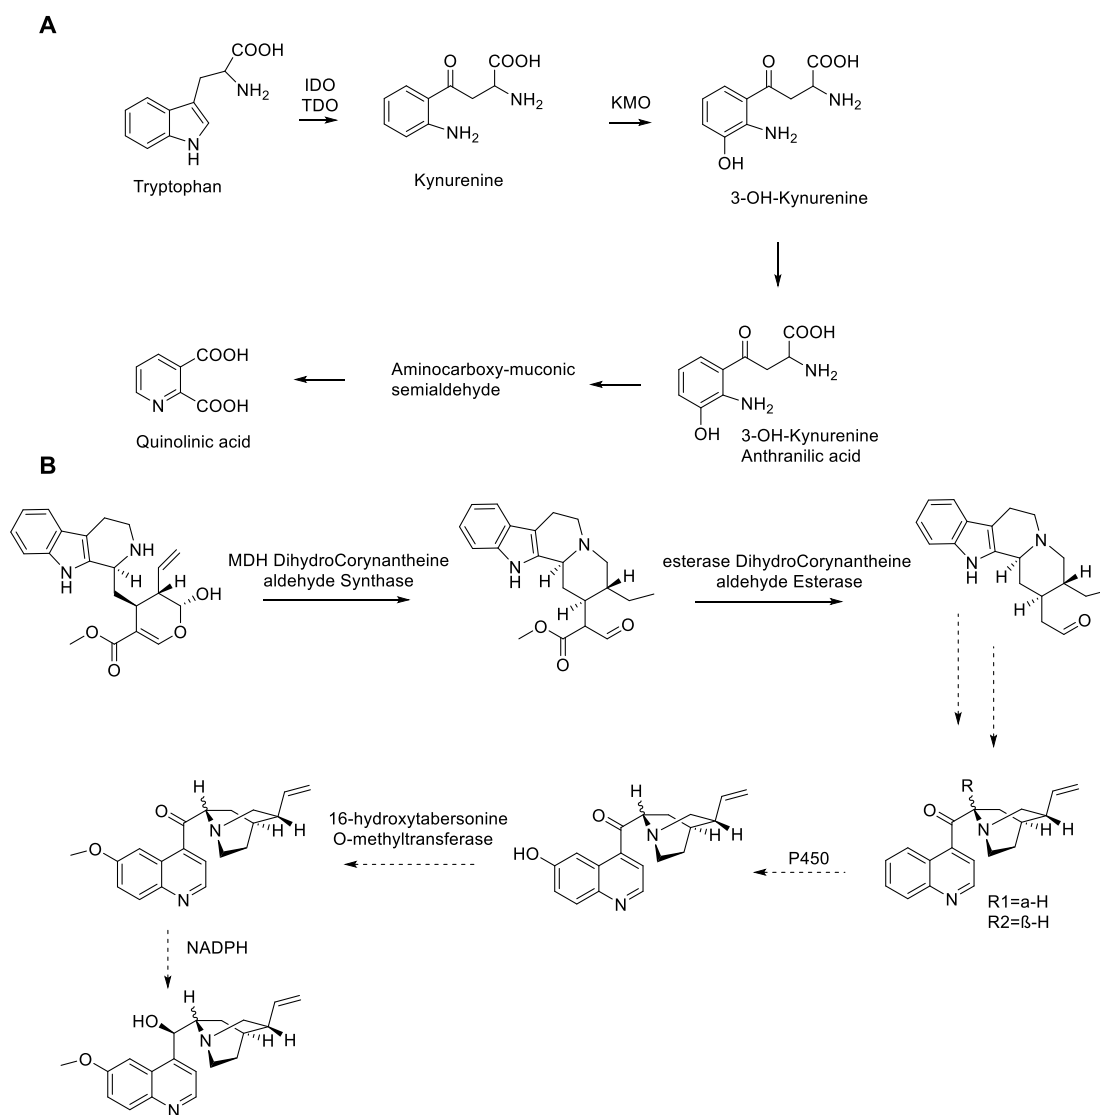

Figure S37. The biosynthetic pathways of the quinoline ring formation

**A:** The formation of primary metabolic pathways of quinoline rings [9] **B:** The formation of secondary metabolic pathways reported on quinoline rings[10]

## Supplementary References

1. Dai XM; Pan HL; Lan WJ; Chen LP; Feng GK; Deng R; Zhu XF; Li HJ. *Phytochemistry*. **2022**, *204*, 113456. doi: 10.1016/j.phytochem.2022.113456
2. Arai, K; Rawlings, B.J; Yoshizawa, Y; Vederas, J.C. *J. Am. Chem. Soc.* **1989**, *111*, 3391-3399. doi: 10.1021/JA00191A042
3. Liu Y; Li Z; Vederas J.C. *Tetrahedron*. **1998**, *54*, 15937-15958. doi: 10.1016/S0040-4020(98)01003-5
4. Ghisalberti E.L; Hockless D.C; Rowland C.Y; White A.H. *Aust. J. Chem.* **1993**, *46*, 571-575. doi: 10.1002/CHIN.199330293
5. Choochuay J; Xu X; Rukachaisirikul V; Guedduaythong P; Phongpaichit S; Sakayaroj J; Chen J; Shen X. *Phytochem. Lett.* **2017**, *22*, 122-127. doi: 10.1016/J.PHYTOL.2017.09.011
6. Shaala L.A; Youssef D.T; Badr J.M; Harakeh S.M. *Molecules*. **2016**, *21*, 1116. doi: 10.3390/molecules21091116.
7. Lee S. J; Baek H. J; Lee C. H; Kim H. P. *Arch. Pharm. Res.* **1994**, *17*, 31-35. doi: 10.1007/BF02978244.
8. Selepe M.A; Drewes S.E; van Heerden F.R. *J. Nat. Prod.* **2010**, *73*, 1680–1685. doi: 10.1021/np100407n. doi:10.1126/science.aaf9794
9. Červenka I; Agudelo L.Z; Ruas J.L. *Science*. **2017**, *357*, 6349. doi:10.1126/science.aaf9794
10. Trenti F; Yamamoto K; Hong B; Paetz C; Nakamura Y; O'Connor S.E. Early and Late Steps of Quinine Biosynthesis. *Org. Lett.* **2021**, *23*, 1793-1797. doi:10.1021/acs.orglett.1c00206
